# Supplementary material
Source: PubMed Central journal article supplement (PMC2824368)
Supplement: 0905795107_pnas.200905795SI.pdf [file 0905795107_pnas.200905795SI.pdf]

# Supporting Information

Maruyama et al. 10.1073/pnas.0905795107

## SI Materials and Methods

**Reverse Transcription PCR (RT-PCR) Analysis.** Total RNA fractions were prepared from seedlings, siliques or seed tissues (whole seeds, embryos or endosperms) using the Wizard SV total RNA Isolation kit (Promega) or the RNeasy Micro Kit (QIAGEN). The dissection of embryos (*em*) and endosperms (*es*) from seeds at 7 DAP was performed as described by Kinoshita et al. (1). First strand cDNA was synthesized using the SuperScriptII First-Strand Synthesis system for RT-PCR (Invitrogen Japan). PCR was performed using the primer sets shown in Table S4.

**Complementation Analysis.** The plasmid pDM121 was constructed by introducing the reading frame cassette A from the Gateway Vector Conversion System (Invitrogen Japan), the *BiP1* cDNA (produced by RT-PCR), and the *NOS* terminator sequence into pCambia1300 (CAMBIA). The promoter regions of *BiP1*, *DD29*, *DD31*, *DD45*, *DD65*, and *FIE* were amplified from *Arabidopsis* genomic DNA by PCR using the primers shown in Table S4. The PCR products were cloned into the pENTR/D-TOPO vector (Invitrogen) and then inserted upstream of the *BiP1* cDNA in pDM121 using LR clonase II (Invitrogen). The resulting plasmids were introduced into the *b1/+ b2/b2* line using the floral dip method (2) and *Agrobacterium tumefaciens* strain GV3101. Transformants were selected on Murashige-Skoog plates containing 50 µg/mL hygromycin. Pistils of each transgenic line were pollinated with wild-type pollen, and ratios of viable and aborted seeds were scored.

**GUS Expression Analysis.** The cloning of the promoter region of *BiP1* is described above. The promoter regions of the *BiP2* and *BiP3* genes were amplified by PCR from *Arabidopsis* genomic DNA us-

ing primers shown in Table S4. The PCR products were cloned into the pENTR/D-TOPO vector (Invitrogen Japan). Each promoter was inserted upstream of the *GUS* reporter gene in pGWB233 (3) (a gift from Tsuyoshi Nakagawa, Shimane University, Matsue, Japan) using LR clonase II (Invitrogen Japan). The resulting plasmids were introduced into the *A. tumefaciens* strain GV3101 by electroporation. *Arabidopsis* was transformed as described above. GUS activity was analyzed as follows. Pollinated pistils or siliques were fixed with ice-cold 90% (vol/vol) acetone for 20 min, washed once with staining buffer (25 mM sodium phosphate, pH 7.2, 20 mM KFe(CN)<sub>2</sub>, 20 mM KFe(CN)<sub>3</sub> and 2% (vol/vol) Triton X-100) and incubated overnight in staining buffer containing 2 mM 5-bromo-4-chloro-3-indolyl-D-glucuronide at 37 °C in the dark. The GUS-stained materials were dehydrated with an ethanol series, postfixed in 50% (vol/vol) ethanol, 10% (vol/vol) acetic acid, and 5% (vol/vol) formaldehyde, and then cleared with 70% ethanol. The samples were rehydrated and immersed in 70% (wt/wt) chloral hydrate, 8.8% (wt/wt) glycerol. Images of the pistils were captured using an SZX7 stereo microscope (Olympus) equipped with a Pro600ES CCD camera (Pixera), and the seeds were photographed using a BX51 microscope (Olympus) equipped with a DP70 cooled CCD camera (Olympus).

**Pollen Analysis.** The Alexander staining of pollen grains and pollen germination assays were performed as described previously (4, 5). For the staining of nuclei in pollen grains, mature pollen grains were stained with 1 µg/mL 4',6-diamidino-2-phenyl indole (DAPI) solution for 1 min and then washed in sterilized water. Images of 0.5 µm sections were captured using a CSU10 confocal laser scanning system (Yokogawa Electric) mounted on a BX60 microscope (Olympus) combined with 405 nm laser irradiation.

1. Kinoshita T, et al. (2004) One-way control of *FWA* imprinting in *Arabidopsis* endosperm by DNA methylation. *Science* 303:521–523.
2. Clough SJ, Bent AF (1998) Floral dip: A simplified method for *Agrobacterium*-mediated transformation of *Arabidopsis thaliana*. *Plant J* 16:735–743.
3. Nakagawa T, et al. (2007) Improved Gateway binary vectors: High-performance vectors for creation of fusion constructs in transgenic analysis of plants. *Biosci Biotechnol Biochem* 71:2095–2100.
4. Alexander M (1969) Differential staining of aborted and nonaborted pollen. *Stain Technol* 44:117–122.
5. Bovid LC, McCormick S (2007) Temperature as a determinant factor for increased and reproducible in vitro pollen germination in *Arabidopsis thaliana*. *Plant J* 52: 570–582.





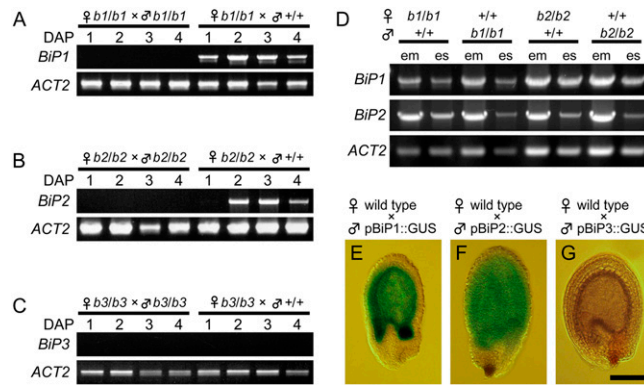

**Fig. S4.** Expression of paternally derived *BiP* genes during early seed development. (A) Pistils of *b1/b1* plants were pollinated with pollen from *b1/b1* or wild-type (*+/+*) plants. Total RNA was prepared from seeds at 1–4 DAP, and expression of the *BiP1* gene was analyzed by RT-PCR. (B) Expression of the *BiP2* gene was analyzed as in (A) except that *b2/b2* plants were used instead of *b1/b1* plants. (C) Expression of the *BiP3* gene was analyzed as in (A) except that *b3/b3* plants were used instead of *b1/b1* plants. (D) Paternally derived *BiP1* and *BiP2* are expressed both in embryo and the endosperm. Cross-pollination was performed between wild-type (*+/+*) plants and *b1/b1* or *b2/b2* plants. Total RNA was isolated from dissected embryo (*em*) and endosperm (*es*) fractions 7 DAP and was subjected to RT-PCR analysis. (E–G) Wild-type pistils were pollinated with pollen expressing GUS from the *BiP1* promoter (*pBiP1::GUS*, E), the *BiP2* promoter (*pBiP2::GUS*, F), or the *BiP3* promoter (*pBiP3::GUS*, G). Seeds were subjected to GUS staining at 3 DAP. (Scale bar, 50  $\mu$ m.)

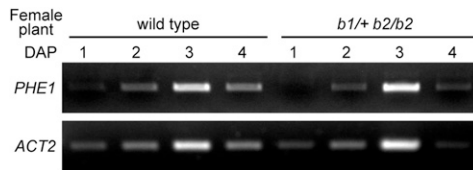

**Fig. S5.** *PHERES1* is not up-regulated in *bip1 bip2* mutant seeds after pollination with wild-type pollen. Wild-type (*+/+ +/+*) or *b1/+ b2/b2* pistils were pollinated with wild-type pollen. Total RNA was prepared from fertilized siliques at 1–4 DAP and expression of the *PHERES1* (*PHE1*) gene was analyzed by RT-PCR.

**Table S1. Percentages of aborted seeds in *bip1 bip2* double mutants**

| Female                            | Male                                     | Aborted seeds | Total seeds | F1 seed abortion (%) |
|-----------------------------------|------------------------------------------|---------------|-------------|----------------------|
| +/+ +/+                           | +/+ +/+                                  | 12            | 2306        | 0.5                  |
| <i>b1/b1</i> +/+                  | <i>b1/b1</i> +/+                         | 8             | 904         | 0.9                  |
| +/+ <i>b2/b2</i>                  | +/+ <i>b2/b2</i>                         | 8             | 954         | 0.8                  |
| <i>b1/+</i> <i>b2/b2</i>          | <i>b1/+</i> <i>b2/b2</i>                 | 303           | 692         | 43.8                 |
| <i>b1/b1</i> <i>b2/+</i>          | <i>b1/b1</i> <i>b2/+</i>                 | 374           | 823         | 45.4                 |
| <i>b1/+</i> +/+                   | +/+ +/+                                  | 6             | 311         | 1.9                  |
| +/+ +/+                           | <i>b1/+</i> +/+                          | 1             | 301         | 0.3                  |
| +/+ <i>b2/+</i>                   | +/+ +/+                                  | 4             | 146         | 2.7                  |
| +/+ +/+                           | +/+ <i>b2/+</i>                          | 3             | 226         | 1.3                  |
| <i>b1/+</i> <i>b2/b2</i>          | +/+ +/+                                  | 83            | 186         | 44.6                 |
| +/+ +/+                           | <i>b1/+</i> <i>b2/b2</i>                 | 1             | 240         | 0.4                  |
| <i>b1/b1</i> <i>b2/+</i>          | +/+ +/+                                  | 61            | 127         | 48.0                 |
| +/+ +/+                           | <i>b1/b1</i> <i>b2/+</i>                 | 5             | 595         | 0.8                  |
| <i>bip1-1/bip1-1</i> <i>b2/b2</i> | <i>bip1-1/bip1-1</i> <i>b2/b2</i>        | 5             | 690         | 0.7                  |
| <i>bip1-1/+</i> <i>b2/b2</i>      | <i>bip1-1/+</i> <i>b2/b2</i>             | 2             | 549         | 0.4                  |
| <i>bip1-2/+</i> <i>b2/b2</i>      | <i>bip1-2/+</i> <i>b2/b2</i>             | 335           | 707         | 47.4                 |
| <i>bip1-3/+</i> <i>b2/b2</i>      | <i>bip1-3/+</i> <i>b2/b2</i>             | 331           | 712         | 46.5                 |
| <i>bip1-1/bip1-1</i> <i>b2/+</i>  | <i>bip1-1/bip1-1</i> <i>b2/+</i>         | 5             | 532         | 0.9                  |
| <i>bip1-2/bip1-2</i> <i>b2/+</i>  | <i>bip1-2/bip1-2</i> <i>b2/+</i>         | 349           | 774         | 45.1                 |
| <i>bip1-3/bip1-3</i> <i>b2/+</i>  | <i>bip1-3/bip1-3</i> <i>b2/+</i>         | 385           | 838         | 45.9                 |
| <i>bip1-1/+</i> +/+               | +/+ +/+                                  | 0             | 316         | 0                    |
| +/+ +/+                           | <i>bip1-1/+</i> +/+                      | 3             | 355         | 0.8                  |
| <i>bip1-2/+</i> +/+               | +/+ +/+                                  | 0             | 82          | 0                    |
| +/+ +/+                           | <i>bip1-2</i> +/+                        | 4             | 123         | 3.3                  |
| <i>bip1-3/+</i> +/+               | +/+ +/+                                  | 1             | 104         | 1.0                  |
| +/+ +/+                           | <i>bip1-3/+</i> +/+                      | 3             | 90          | 3.3                  |
| <i>bip1-1/+</i> <i>b2/b2</i>      | +/+ +/+                                  | 1             | 82          | 1.2                  |
| +/+ +/+                           | <i>bip1-1/+</i> <i>b2/b2</i>             | 1             | 490         | 0.2                  |
| <i>bip1-2/+</i> <i>b2/b2</i>      | +/+ +/+                                  | 248           | 524         | 47.3                 |
| +/+ +/+                           | <i>bip1-2/+</i> <i>b2/b2</i>             | 2             | 148         | 1.4                  |
| <i>bip1-3/+</i> <i>b2/b2</i>      | +/+ +/+                                  | 174           | 370         | 47.0                 |
| +/+ +/+                           | <i>bip1-3/+</i> <i>b2/b2</i>             | 2             | 314         | 0.6                  |
| <i>bip1-1/bip1-1</i> <i>b2/+</i>  | +/+ +/+                                  | 0             | 261         | 0                    |
| +/+ +/+                           | <i>bip1-1/</i> <i>bip1-1</i> <i>b2/+</i> | 2             | 622         | 0.3                  |
| <i>bip1-2/bip1-2</i> <i>b2/+</i>  | +/+ +/+                                  | 75            | 169         | 44.4                 |
| +/+ +/+                           | <i>bip1-2/bip1-2</i> <i>b2/+</i>         | 3             | 389         | 0.8                  |
| <i>bip1-3/bip1-3</i> <i>b2/+</i>  | +/+ +/+                                  | 172           | 386         | 44.6                 |
| +/+ +/+                           | <i>bip1-3/bip1-3</i> <i>b2/+</i>         | 1             | 143         | 0.7                  |

**Table S2. Transmission of *BiP* alleles to F1 progenies after reciprocal crosses between mutant and wild-type plants**

| Genetic cross     |                   | F1               |      |                 |      |                                     |          |
|-------------------|-------------------|------------------|------|-----------------|------|-------------------------------------|----------|
| Female            | Male              | Genotype         | %    | Genotype        | %    | <i>P</i> value for 1:1 segregation* | <i>n</i> |
| <i>b1/+ +/+</i>   | <i>+/+ +/+</i>    | <i>b1/+ +/+</i>  | 53.0 | <i>+/+ +/+</i>  | 47.0 | 0.41                                | 181      |
| <i>+/+ +/+</i>    | <i>b1/+ +/+</i>   | <i>b1/+ +/+</i>  | 47.1 | <i>+/+ +/+</i>  | 52.9 | 0.49                                | 140      |
| <i>+/+ b2/+</i>   | <i>+/+ +/+</i>    | <i>+/+ b2/+</i>  | 55.7 | <i>+/+ +/+</i>  | 44.3 | 0.24                                | 106      |
| <i>+/+ +/+</i>    | <i>+/+ b2/+</i>   | <i>+/+ b2/+</i>  | 50.8 | <i>+/+ +/+</i>  | 49.2 | 0.86                                | 132      |
| <i>b1/+ b2/b2</i> | <i>+/+ +/+</i>    | <i>b1/+ b2/+</i> | 2.5  | <i>+/+ b2/+</i> | 97.5 | $1.31 \times 10^{-31} *$            | 157      |
| <i>+/+ +/+</i>    | <i>b1/+ b2/b2</i> | <i>b1/+ b2/+</i> | 15.0 | <i>+/+ b2/+</i> | 85.0 | $8.41 \times 10^{-19} *$            | 160      |
| <i>b1/b1 b2/+</i> | <i>+/+ +/+</i>    | <i>b1/+ b2/+</i> | 0    | <i>b1/+ +/+</i> | 100  | $1.80 \times 10^{-20} *$            | 86       |
| <i>+/+ +/+</i>    | <i>b1/b1 b2/+</i> | <i>b1/+ b2/+</i> | 27.8 | <i>b1/+ +/+</i> | 72.2 | $1.48 \times 10^{-12} *$            | 255      |

\*Validation by  $\chi^2$  test. \* Significant difference with the probability value  $P < 0.01$ .

**Table S3. Complementation of the seed abortion phenotype in *bip1 bip2* mutant female gametophytes**

| Transgene (target cell)                 | Line no. | Aborted seeds (%) | <i>P</i> value for aborted:viable = 1:1* | <i>P</i> value for aborted:viable= 1:3* | <i>n</i> |
|-----------------------------------------|----------|-------------------|------------------------------------------|-----------------------------------------|----------|
| <i>pBiP1::BiP1</i>                      | 1        | 22.0              | $1.16 \times 10^{-7} *$                  | 0.73                                    | 218      |
| <i>pDD29::BiP1</i><br>(antipodal cells) | 1        | 49.5              | 0.91                                     | $1.63 \times 10^{-8} *$                 | 275      |
|                                         | 2        | 45.6              | 0.38                                     | $1.99 \times 10^{-6} *$                 | 136      |
|                                         | 3        | 32.3              | $4.02 \times 10^{-4} *$                  | 0.09                                    | 130      |
|                                         | 4        | 40.6              | 0.06                                     | $3.27 \times 10^{-4} *$                 | 286      |
| <i>pDD31::BiP1</i><br>(synergid cells)  | 1        | 47.7              | 0.64                                     | $1.67 \times 10^{-7} *$                 | 128      |
|                                         | 2        | 48.1              | 0.71                                     | $9.00 \times 10^{-8} *$                 | 216      |
|                                         | 3        | 43.5              | 0.19                                     | $1.98 \times 10^{-5} *$                 | 368      |
|                                         | 4        | 54.8              | 0.34                                     | $6.07 \times 10^{-12} *$                | 230      |
| <i>pDD45::BiP1</i><br>(egg cell)        | 1        | 48.4              | 0.75                                     | $6.21 \times 10^{-8} *$                 | 64       |
|                                         | 2        | 40.7              | 0.06                                     | $2.84 \times 10^{-4} *$                 | 140      |
|                                         | 3        | 45.5              | 0.37                                     | $2.10 \times 10^{-6} *$                 | 426      |
|                                         | 4        | 42.7              | 0.15                                     | $4.15 \times 10^{-5} *$                 | 524      |
| <i>pDD65::BiP1</i><br>(central cell)    | 1        | 29.5              | $4.09 \times 10^{-5} *$                  | 0.30                                    | 78       |
|                                         | 2        | 25.0              | $5.74 \times 10^{-7} *$                  | 1.00                                    | 152      |
|                                         | 3        | 26.4              | $2.36 \times 10^{-6} *$                  | 0.75                                    | 125      |
|                                         | 4        | 24.7              | $4.35 \times 10^{-7} *$                  | 0.95                                    | 283      |
| <i>pFIE::BiP1</i><br>(central cell)     | 1        | 22.7              | $4.78 \times 10^{-8} *$                  | 0.60                                    | 185      |
|                                         | 2        | 24.0              | $1.93 \times 10^{-7} *$                  | 0.81                                    | 146      |

Each *bip1-4/+ bip2-1/bip2-1* line that was also hemizygous for the transgene shown in the table was pollinated with wild-type pollen, and the percentage of aborted seeds was analyzed.

\*Validation by  $\chi^2$  test. \*Significant difference with the probability value  $P < 0.01$ .
